# Supplementary material
Source: publisher figshare collection journal article supplement (https://acs.figshare.com/ndownloader/files/4627501)
Supplement: Supplementary file 1 [file 4627501]

### Supporting Information

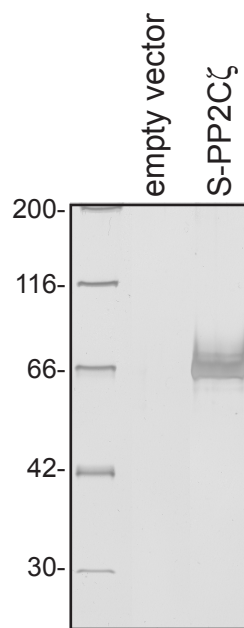

#### Supplementary figure

293 cells ( three 10 cm-dishes) were transfected with either empty vector or expression construct of S-PP2C $\zeta$ . The expressed protein was purified on S-protein beads, separated on 4-20% gradient gel and visualized by silver staining.
